# Supplementary material
Source: PubMed Central journal article supplement (PMC2712026)

Biophysical Journal, Volume 96

**Supporting Material**

**Study of *Thermomyces lanuginosa* lipase in presence of tributyrilglycerol and water**

Santini S., Crowet J.M., Thomas A., Paquot M., Vandebol M., Thonart P., Wathélet J.P., Blecker C., Lognay G., Brasseur R., Lins L., and Charlotiaux B.

**Figure S1:** GROMOS topology file of a TBG molecule.

```
[ moleculetype ]
; Name          nrexcl
TBG             3

[ atoms ]
;  nr      type  resnr residue  atom  cgnr   charge    mass  typeB   chargeB   massB
  1        CH3    1    TBG    CA4    1      0      14.027
  2        CH2    1    TBG    CA3    1      0      14.027
  3        CH2    1    TBG    CA2    1      0      14.027
  4         C     1    TBG    CA1    1     0.54     12.011
  5         O     1    TBG    OA1    1    -0.38     15.9994
  6         OA    1    TBG    OG1    1    -0.36     15.9994
  7        CH2    1    TBG    CG1    1      0.2      14.027
  8        CH1    1    TBG    CG2    2      0.2      13.019
  9         OA    1    TBG    OG2    2    -0.36     15.9994
 10         C     1    TBG    CB1    2      0.54     12.011
 11         O     1    TBG    OB1    2    -0.38     15.9994
 12        CH2    1    TBG    CB2    2      0      14.027
 13        CH2    1    TBG    CB3    2      0      14.027
 14        CH3    1    TBG    CB4    2      0      14.027
 15        CH2    1    TBG    CG3    3      0.2      14.027
 16         OA    1    TBG    OG3    3    -0.36     15.9994
 17         C     1    TBG    CC1    3      0.54     12.011
 18         O     1    TBG    OC1    3    -0.38     15.9994
 19        CH2    1    TBG    CC2    3      0      14.027
 20        CH2    1    TBG    CC3    3      0      14.027
 21        CH3    1    TBG    CC4    3      0      14.027  ; qtot 0

[ bonds ]
;  ai  aj  funct          c0          c1          c2          c3
  1    2    gb_26
  2    3    gb_26
  3    4    gb_26
  4    5    gb_4
  4    6    gb_12
  6    7    gb_17
  7    8    gb_26
  8    9    gb_17
  8   15    gb_26
  9   10    gb_12
 10   11    gb_4
 10   12    gb_26
 12   13    gb_26
 13   14    gb_26
 15   16    gb_17
 16   17    gb_12
 17   18    gb_4
 17   19    gb_26
 19   20    gb_26
 20   21    gb_26

[ pairs ]
;  ai  aj  funct          c0          c1          c2          c3
  1    4
  2    5
  2    6
  3    7
  4    8
  5    7
  6    9
  6   15
  7   10
  7   16
  8   11
  8   12
  8   17
  9   13
  9   16
 10   14
```

```

10 15
11 13
15 18
15 19
16 20
17 21
18 20

```

```

[ angles ]
; ai aj ak funct c0 c1 c2 c3
  1  2  3      ga_12
  2  3  4      ga_12
  3  4  5      ga_29
  3  4  6      ga_18
  5  4  6      ga_32
  4  6  7      ga_9
  6  7  8      ga_12
  7  8  9      ga_12
  7  8 15      ga_12
  9  8 15      ga_12
  8  9 10      ga_9
  9 10 11      ga_32
  9 10 12      ga_18
 11 10 12      ga_29
 10 12 13      ga_12
 12 13 14      ga_12
  8 15 16      ga_12
 15 16 17      ga_9
 16 17 18      ga_32
 16 17 19      ga_18
 18 17 19      ga_29
 17 19 20      ga_12
 19 20 21      ga_12

```

```

[ dihedrals ]
; ai aj ak al funct c0 c1 c2 c3
c4 c5
  1  2  3  4      gd_17
  2  3  4  6      gd_20
  3  4  6  7      gd_12
  4  6  7  8      gd_12
  6  7  8 15      gd_17
  7  8  9 10      gd_12
  7  8 15 16      gd_17
  8  9 10 12      gd_12
  9 10 12 13      gd_20
 10 12 13 14      gd_17
  8 15 16 17      gd_12
 15 16 17 19      gd_12
 16 17 19 20      gd_20
 17 19 20 21      gd_17

```

```

[ dihedrals ]
; ai aj ak al funct c0 c1 c2 c3
  3  5  6  4      gi_1
 10  9 11 12      gi_1
 17 16 18 19      gi_1

```

**Figure S2:** DSSP diagram for different runs and 3 representative snapshots of the secondary TBG-binding pocket. Snapshot panels: the TBG molecule is in orange, the lid fragment in magenta, and the catalytic triad in blue. The secondary TBG-binding pocket is represented by a green surface and the water molecule between the lid and the TBG molecule is shown in red.

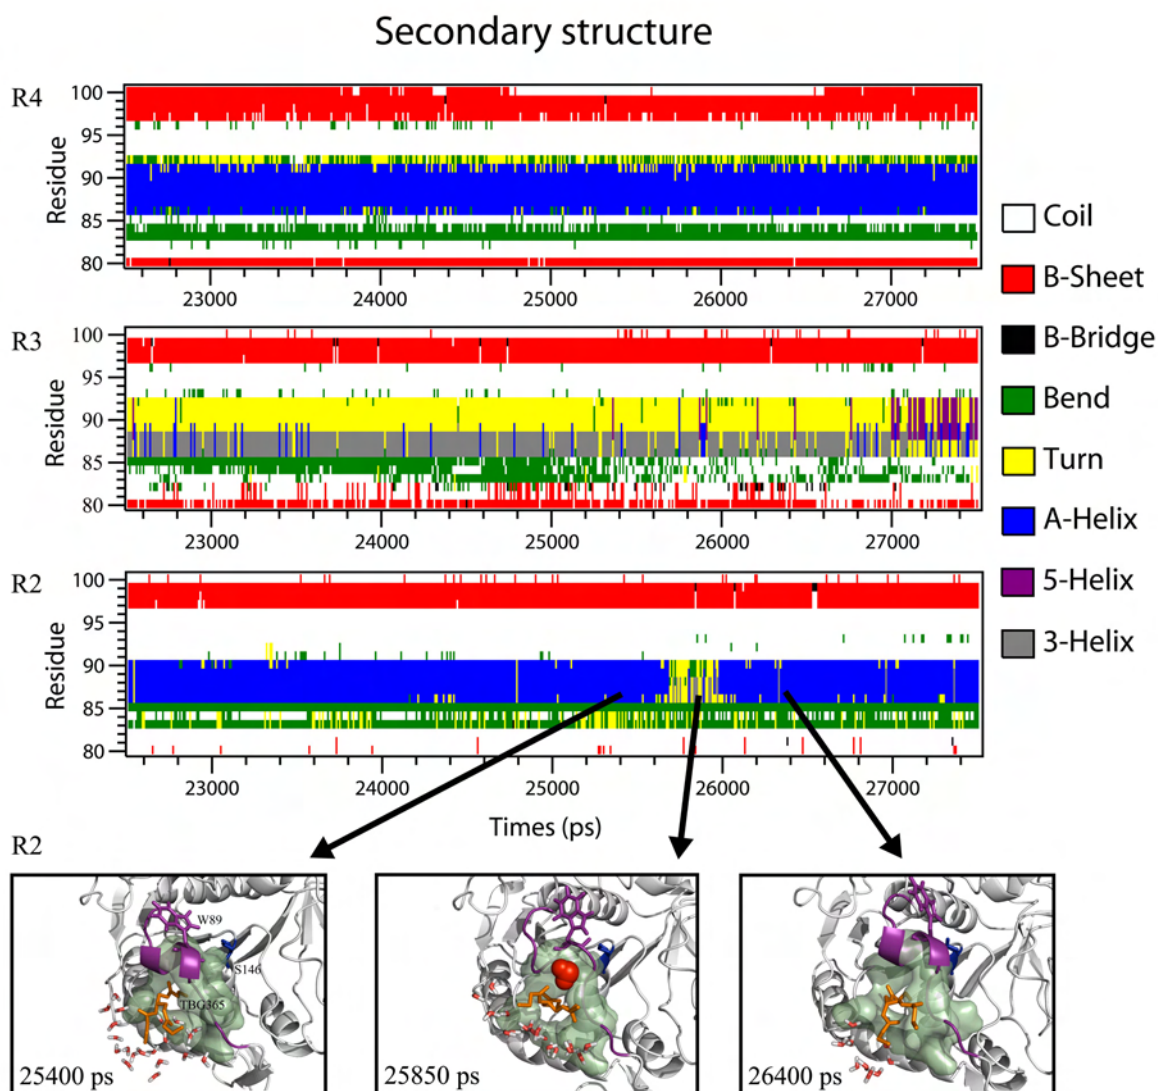

Supplement: mmc1.pdf [file mmc1.pdf]
